# Supplementary material
Source: PubMed Central journal article supplement (PMC3196139)
Supplement: supp_M111.265348_jbc.M111.265348-1.pdf [file supp_M111.265348_jbc.M111.265348-1.pdf]

**Supplemental Table 1. Choline metabolites in *Bhmt*<sup>+/-</sup> tissues**

|               | Betaine     | Choline  | GPCho        | PCho        | PtdCho         | SM          |
|---------------|-------------|----------|--------------|-------------|----------------|-------------|
| <b>Liver</b>  | 1,923 ± 364 | 154 ± 36 | 1,730 ± 554  | 294 ± 67    | 15,897 ± 1,200 | 1,018 ± 131 |
| <b>Kidney</b> | 1,296 ± 192 | 834 ± 28 | 15,786 ± 748 | 885 ± 31    | 14,035 ± 420   | 2,768 ± 60  |
| <b>Heart</b>  | 95 ± 29     | 102 ± 7  | 212 ± 65     | 193 ± 13    | 9,877 ± 471    | 738 ± 48    |
| <b>Muscle</b> | 49 ± 4      | 67 ± 15  | 84 ± 10      | 41 ± 8      | 6,388 ± 174*   | 397 ± 11    |
| <b>Brain</b>  | 18 ± 2      | 197 ± 36 | 1,322 ± 58   | 588 ± 35    | 20,441 ± 402   | 1,869 ± 84  |
| <b>Lung</b>   | 239 ± 26    | 224 ± 26 | 3,432 ± 203  | 588 ± 20    | 14,777 ± 343   | 2,415 ± 63  |
| <b>Testis</b> | 2,334 ± 239 | 439 ± 30 | 859 ± 157    | 4,495 ± 193 | 6,581 ± 490    | 1,039 ± 61  |

Tissues were harvested from 5 week old *Bhmt*<sup>+/-</sup> mice. Data are presented as mean ± SEM, n=6 animals. \*p<0.05, different from *Bhmt*<sup>+/+</sup> by Students' *t* test. Concentrations are expressed as nmol/g. PCho, phosphocholine; PtdCho, phosphatidylcholine; GPCho, glycerophosphocholine; SM, sphingomyelin; ND, not detected. Choline metabolites in adipose and plasma were not measured in *Bhmt*<sup>+/-</sup> mice.

**Supplemental Table 2. Metabolites in *Bhmt*<sup>+/-</sup> mice**

| Organ  | Metabolites             | <i>Bhmt</i> <sup>+/-</sup> |
|--------|-------------------------|----------------------------|
| Liver  | AdoMet [nmol/g tissue]  | 86.3 ± 22.8                |
|        | AdoHcy [nmol/g tissue]  | 35.4 ± 12.1                |
|        | AdoMet:AdoHcy           | 2.9 ± 0.4                  |
| Plasma | tHomocysteine [μM]      | 6.3 ± 0.3                  |
|        | Cysteine [μM]           | 102.6 ± 8.4* <sup>#</sup>  |
|        | Total folate [ng/ml]    | 81.3 ± 17.7                |
|        | ALT [U/I]               | 31.0 ± 1.6                 |
|        | BUN [mg/dL]             | 13.55 ± 0.3                |
|        | Creatinine [mg/dL]      | <0.1                       |
|        | LDH [U/I]               | 917.3 ± 165.5              |
|        | CK [U/I]                | 793.3 ± 51.3               |
|        | Triacylglycerol [mg/dL] | 71.2 ± 5.8                 |
|        | Cholesterol [mg/dL]     | 48.7 ± 20.1                |
|        | HDL-Cholesterol [mg/dL] | 37.9 ± 14.9                |
|        | Glucose [mg/dL]         | 259.1 ± 13.1               |
|        | NEFA [mM]               | 0.29 ± 0.04                |
|        | Hydroxybutyrate [mM]    | 0.39 ± 0.02                |

Tissues were harvested from 5 week old *Bhmt*<sup>+/-</sup> mice. Data are presented as mean ± SEM, n=3-6 per group. \*p<0.05, different from *Bhmt*<sup>+/+</sup> by Students' *t* test. <sup>#</sup>p<0.05, different from *Bhmt*<sup>+/-</sup> by Students' *t* test. AdoMet, S-adenosylmethionine; AdoHcy, S-adenosylhomocysteine. ALT, alanine transaminase; BUN, plasma urea nitrogen; LDH, lactate dehydrogenase; CK, creatinine kinase; HDL-C, high density lipoprotein cholesterol; NEFA, non-esterified fatty acids.
